# Supplementary material for: Far-red luminescent ruthenium pyridylimine complexes; building blocks for multinuclear arrays
Source: Royal Society of Chemistry journal article supplement (doi:10.1039/b518027a), 2006-01-01
Supplement: b518027a.pdf [file b518027a.pdf]

## Supplementary Information

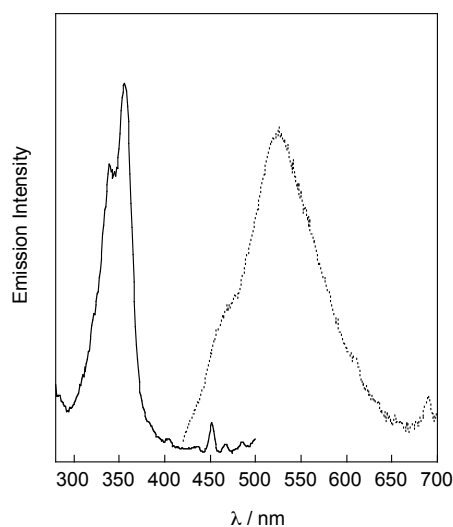

**Figure S1** Corrected luminescence (dotted line) and excitation (solid line) spectra of a solution of **1** ( $9 \times 10^{-5} M$ ) in  $CH_3CN$   $\lambda_{exc} = 360 nm$  and  $\lambda_{em} = 520 nm$ , respectively highlighting the emission at 520nm. Intensities are not normalised

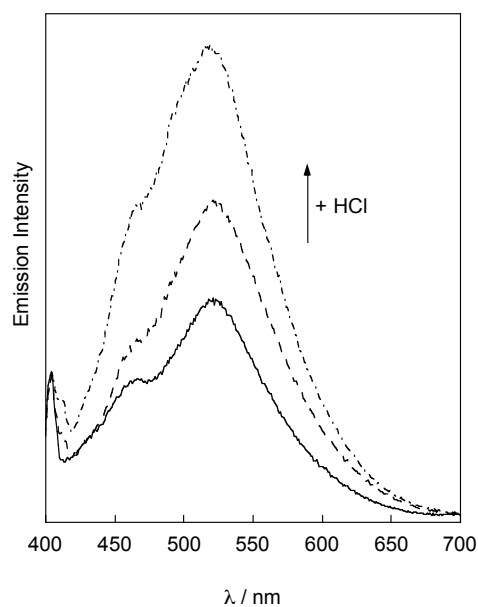

**Figure S2** Effect on the 520nm band in the luminescence spectra of **1** in  $CH_3CN$  upon addition of aliquots of an aqueous solution of  $HCl$  (dotted lines) in excess.
